# Supplementary material for: Isochronic development of cortical synapses in primates and mice
Source: Springer Nature journal article supplement (doi:10.1038/s41467-023-43088-3), 2023-12-04
Supplement: MOESM2 [file 41467_2023_43088_MOESM2_ESM.pdf › 41467_2023_43088_MOESM2_ESM.pdf]

### Isochronic Development of Cortical Synapses in Primates and Mice

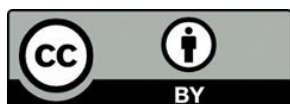

**Open Access** This file is licensed under a Creative Commons Attribution 4.0 International License, which permits use, sharing, adaptation, distribution and reproduction in any medium or format, as long as you give appropriate credit to the original author(s) and the source, provide a link to the Creative Commons license, and indicate if changes were made. In the cases where the authors are anonymous, such as is the case for the reports of anonymous peer reviewers, author attribution should be to 'Anonymous Referee' followed by a clear attribution to the source work. The images or other third party material in this file are included in the article's Creative Commons license, unless indicated otherwise in a credit line to the material. If material is not included in the article's Creative Commons license and your intended use is not permitted by statutory regulation or exceeds the permitted use, you will need to obtain permission directly from the copyright holder. To view a copy of this license, visit <http://creativecommons.org/licenses/by/4.0/>.

**Editorial Note:** This manuscript has been previously reviewed at another journal that is not operating a transparent peer review scheme. This document only contains reviewer comments and rebuttal letters for versions considered at *Nature Communications*. Mentions of the other journal have been redacted.

## **REVIEWERS' COMMENTS**

### **Reviewer #2 (Remarks to the Author):**

The authors have satisfactorily addressed all my questions, and I appreciate their responses. However, upon examination of their data availability section, I've discovered a error that I had previously overlooked.

The MICrONS dataset that contains layer 4 was collected from a P87 mouse, not a P36. While this error may not impact their overall conclusions. nevertheless, it does affect the figures and should be corrected

### **Reviewer #3 (Remarks to the Author):**

I had reviewed this paper in its previous life at [REDACTED] and found it to be a remarkably interesting and well executed set of studies. The authors have responded the the very few concerns that arose then. As a result I am happy to recommend acceptance.

## REVIEWERS' COMMENTS

Reviewer #2 (Remarks to the Author):

The authors have satisfactorily addressed all my questions, and I appreciate their responses. However, upon examination of their data availability section, I've discovered a error that I had previously overlooked.

The MICrONS dataset that contains layer 4 was collected from a P87 mouse, not a P36. While this error may not impact their overall conclusions. nevertheless, it does affect the figures and should be corrected.

We apologize for this oversight and confused the MICrONS L2/3 p36 age for also being the age of the MM<sup>3</sup> dataset. We corrected all aspects of the manuscript including replotting the data, and all references to this age in the text.

Reviewer #3 (Remarks to the Author):

I had reviewed this paper in its previous life at Nature Neuroscience and found it to be a remarkably interesting and well executed set of studies. The authors have responded the the very few concerns that arose then. As a result I am happy to recommend acceptance.
