# Supplementary material for: Isochronic development of cortical synapses in primates and mice
Source: Nat Commun. 2023 Dec 4;14:8018. doi: 10.1038/s41467-023-43088-3 (PMC10695974; doi:10.1038/s41467-023-43088-3)
Supplement: Supplementary file 4 — Source Data [file 41467_2023_43088_MOESM4_ESM.xlsx]

## Sheet: Figure 1b and c
Mouse V1, L2/3									Mouse V1, L4								Mouse S1, L2/3								Mouse S1, L4								Primate V1, L2/3								Primate V1, L4
p6									p6								p9								p7								p7								p7
Dendrite	dendrite length (um)	# spine syn	#shaft syn	spine syn/um	shaft syn/um				Dendrite	dendrite length (µm)	# spine syn	#shaft syn	spine syn/µm	shaft syn/µm			Dendrite	dendrite length (µm)	# spine syn	spine syn/µm					Dendrite	dendrite length (µm)	# spine syn	spine syn/µm					Dendrite	dendrite length (µm)	# spine syn	#shaft syn	spine syn/µm	shaft syn/µm			Dendrite	dendrite length (µm)	# spine syn	#shaft syn	spine syn/µm	shaft syn/µm
01_Eden *	10.2789	0	2	0	0.194573				randDen01 *	35.9102	0	1	0	0.0278472			1	18.9584	3	0.158241					1	8.36048	0	0					1	16.2422	5	2	0.307841	0.123136			1	10.6131	7	2	0.65956	0.188446
02_Eden *	15.288	2	3	0.130821	0.196232				randDen02 *	29.1719	2	5	0.0685591	0.171398			2	19.2121	3	0.156151					2	14.1538	0	0					2	12.7733	2	2	0.156576	0.156576			2	9.98012	7	3	0.701394	0.300597
03_Eden *	7.42629	0	2	0	0.269313				randDen03 *	73.227	1	5	0.0136562	0.0682808			3	15.4487	0	0					3	15.0278	0	0					3	13.8862	1	1	0.0720138	0.0720138			3	9.59552	1	2	0.104215	0.208431
04_Eden *	7.42934	0	3	0	0.403805				randDen04 *	28.642	0	6	0	0.209482			4	21.1206	4	0.189388					4	11.0952	1	0.0901291					4	10.8381	7	1	0.645871	0.0922673			4	12.6145	5	2	0.39637	0.158548
05_Eden *	11.9339	0	3	0	0.251384				randDen05 *	27.2334	0	6	0	0.220317			5	19.055	1	0.0524798					5	8.04026	0	0					5	12.8978	4	2	0.31013	0.155065			5	9.71517	10	2	1.02932	0.205864
06_Eden *	12.2663	0	1	0	0.0815239				randDen06 *	13.938	0	1	0	0.0717463			6	22.9026	2	0.0873263					6	4.84692	0	0					6	13.8572	3	0	0.216494	0			6	8.55458	10	4	1.16896	0.467586
07_Eden *	9.62536	0	2	0	0.207784				randDen07 *	18.0417	0	1	0	0.055427			7	12.3689	3	0.242544					7	11.3812	1	0.0878645					7	8.17526	4	1	0.489281	0.12232			7	9.21911	7	2	0.759292	0.216941
08_Eden *	12.8612	0	1	0	0.0777535				randDen08 *	18.2853	0	3	0	0.164066			8	23.9635	5	0.208651					8	13.1954	0	0					8	16.3905	1	1	0.0610111	0.0610111			8	11.2344	1	2	0.0890122	0.178024
09_Eden *	10.9636	0	1	0	0.0912111				randDen09 *	40.6662	0	5	0	0.122952			9	15.0376	2	0.133					9	12.8523	1	0.0778069					9	12.1047	5	1	0.413063	0.0826125			9	11.5955	5	2	0.431201	0.17248
10_Eden *	13.6229	0	1	0	0.0734058				randDen11 *	25.484	0	0	0	0			10	22.7318	3	0.131973					10	7.22491	0	0					10	12.5212	4	1	0.319459	0.0798647			10	10.4693	10	2	0.95517	0.191034
11_Eden *	9.14172	0	1	0	0.109389				randDen12 *	11.5358	0	1	0	0.0866864			11	21.9918	10	0.454714					11	13.6173	0	0					11	10.8111	0	1	0	0.0924972			11	11.9745	14	6	1.16915	0.501066
12_Eden *	11.1952	0	5	0	0.446618				radnden13	45.6878	0	0	0	0			12	19.1803	1	0.0521368					12	13.0844	0	0					12	8.83456	7	1	0.792343	0.113192			12	8.04948	5	0	0.621158	0
13_Eden *	11.074	0	0	0	0				randden14 *	26.7829	0	2	0	0.0746746			13	17.785	4	0.224909					13	12.0384	1	0.0830677					13	9.79093	6	1	0.612812	0.102135			13	11.8935	12	1	1.00896	0.0840797
14_Eden *	14.9825	0	2	0	0.133489				randden15 *	12.7173	1	0	0.0786329	0			14	17.4042	0	0					14	12.2171	1	0.0818524					14	11.3972	0	7	0	0.614188			14	8.98786	3	1	0.333783	0.111261
15_Eden *	11.5425	0	1	0	0.0866363				randden16 *	11.1692	0	0	0	0			15	25.2709	1	0.0395711					15	11.4915	1	0.0870211					15	10.31	5	3	0.484968	0.290981			15	11.2777	4	2	0.354684	0.177342
16_Eden *	8.45425	0	1	0	0.118284				randden17 *	19.3953	0	2	0	0.103118			16	12.479	1	0.0801346					16	16.8606	1	0.0593098					16	11.704	1	1	0.0854411	0.0854411			16	10.1216	6	1	0.592791	0.0987985
17_Eden *	13.7241	0	2	0	0.145729				randden18 *	9.2878	1	1	0.107668	0.107668			17	24.1236	1	0.0414532					17	12.54	0	0					17	10.5189	2	0	0.190134	0			17	15.8503	18	6	1.13562	0.378541
18_Eden *	11.1058	0	0	0	0				randden19 *	14.0243	1	0	0.071305	0			18	17.9353	3	0.167268					18	14.9802	0	0					18	9.85113	2	0	0.203022	0			18	9.59576	9	1	0.937914	0.104213
19_Eden *	9.63907	0	2	0	0.207489				randden20 *	11.7877	0	1	0	0.0848344			19	17.4039	3	0.172375					19	10.3941	0	0					19	11.8527	3	0	0.253108	0			19	10.7377	6	0	0.558779	0
20_Eden *	11.3813	0	2	0	0.175726												20	19.9249	7	0.35132					20	13.3749	0	0					20	10.8891	6	2	0.551012	0.183671			20	9.15497	0	2	0	0.218461
			ave	0.00654106	0.163517							ave	0.0178853	0.0825526					ave	0.147182							ave	0.0283526								ave	0.308229	0.121349						ave	0.650367	0.198086
			n	20	20							n	20	20					n	20							n	20								n	20	20						n	20	20
			stdev	0.0292525	0.116049							stdev	0.0346963	0.0709155					stdev	0.114887							stdev	0.0400725								stdev	0.228409	0.135634						stdev	0.368855	0.131652
			sem	0.00654106	0.0259494							sem	0.00775832	0.0158572					sem	0.0256895							sem	0.00896049								sem	0.0510739	0.0303286						sem	0.0824785	0.0294384
p14									p14								p14								p14								p75								p75
dendrite	dendrite length (um)	# spine syn	#shaft syn	spine syn/um	shaft syn/um				dendrite	dendrite length (µm)	# spine syn	#shaft syn	spine syn/um	shaft syn/um			dendrite	dendrite length (µm)	# spine syn	spine syn/µm					dendrite	dendrite length (µm)	# spine syn	spine syn/µm					Dendrite	dendrite length (µm)	# spine syn	#shaft syn	spine syn/µm	shaft syn/µm			Dendrite	dendrite length (µm)	# spine syn	#shaft syn	spine syn/µm	shaft syn/µm
1	10.4007	10	1	0.961476	0.0961476				1	9.74183	3	0	0.30795	0			1	15.4085	7	0.454293					1	16.7433	1	0.0597253					2	23.9653	17	3	0.709359	0.125181			1	10.2509	6	3	0.585313	0.292656
2	10.0361	10	1	0.9964	0.09964				2	10.5372	5	0	0.474509	0			2	8.75954	8	0.91329					2	19.6242	5	0.254787					3	4.74845	19	0	4.0013	0			2	11.6522	29	1	2.48881	0.085821
3	10.4275	5	1	0.479503	0.0959006				3	9.93438	3	0	0.301982	0			3	11.3968	5	0.43872					3	16.3535	11	0.672641					4	19.9823	87	9	4.35386	0.450399			3	10.0355	25	3	2.49116	0.29894
4	10.5693	7	0	0.662293	0				4	10.4024	3	2	0.288396	0.192264			4	9.62513	14	1.45453					4	16.5124	6	0.363364					5	12.7756	26	0	2.03514	0			4	9.39702	23	2	2.44758	0.212833
5	10.898	13	2	1.19288	0.18352				5	12.8973	6	0	0.465212	0			5	10.2648	7	0.68194					5	19.2904	1	0.0518392					6	14.0363	27	2	1.92358	0.142488			5	7.59973	11	2	1.44742	0.263167
6	11.0693	15	0	1.3551	0				6	9.53413	10	0	1.04886	0			6	13.1366	5	0.380617					6	17.6367	12	0.680401					7	10.5424	20	1	1.89709	0.0948547			6	8.37177	18	3	2.15008	0.358347
7	11.6456	14	2	1.20217	0.171738				7	9.87364	10	0	1.0128	0			7	10.9401	6	0.54844					7	17.3001	3	0.173409					8	7.43425	9	2	1.21061	0.269025			7	10.6176	17	3	1.60112	0.28255
8	10.827	10	2	0.923618	0.184724				8	10.2242	11	2	1.07588	0.195615			8	11.3648	8	0.703926					8	22.8031	19	0.833219					9	9.17404	24	3	2.61608	0.32701			8	10.8378	27	0	2.49127	0
9	10.0769	10	2	0.992371	0.198474				9	9.98505	13	1	1.30195	0.10015			9	11.0582	9	0.813877					9	18.9806	8	0.421482					10	10.3257	23	1	2.22745	0.0968455			9	9.78141	18	3	1.84022	0.306704
10	9.78281	5	0	0.511101	0				10	10.1137	10	0	0.988753	0			10	10.0136	0	0					10	17.2384	0	0					11	10.2364	17	1	1.66075	0.0976909			10	9.70625	28	2	2.88474	0.206053
11	9.79992	11	0	1.12246	0				11	8.74544	7	1	0.800417	0.114345			11	9.26852	6	0.647352					11	12.4842	4	0.320404					12	9.4063	27	2	2.87042	0.212623			11	6.21409	29	3	4.66682	0.482774
12	10.3982	17	0	1.6349	0				12	11.0113	6	1	0.544896	0.0908161			12	11.7764	2	0.169832					12	20.9248	3	0.143371					13	10.7143	25	1	2.33333	0.0933332			12	14.4429	18	2	1.24629	0.138476
13	11.1169	10	0	0.899534	0				13	9.54703	12	3	1.25694	0.314234			13	6.74799	4	0.592769					13	17.1997	17	0.988388					14	8.62481	25	4	2.89861	0.463778			13	9.19888	15	1	1.63063	0.108709
14	10.4961	2	0	0.190547	0				14	10.9672	11	0	1.00299	0			14	1.38633	8	5.77063					14	12.3399	5	0.405189					15	10.6803	15	2	1.40446	0.187261			14	9.50449	22	2	2.3147	0.210427
15	9.38094	11	1	1.17259	0.106599				15	9.80728	14	3	1.42751	0.305895			15	11.1092	6	0.540094					15	12.1629	6	0.493301					16	11.4097	21	1	1.84053	0.0876445			15	11.415	27	3	2.3653	0.262811
16	11.3099	6	2	0.530509	0.176836				16	10.4333	5	1	0.479234	0.0958467			16	10.9155	9	0.824513					16	12.4685	3	0.240607					17	14.5628	30	4	2.06004	0.274672
17	10.3977	8	2	0.769399	0.19235				17	10.5338	12	2	1.13919	0.189866			17	11.4092	12	1.05178					17	7.30369	1	0.136917					18	10.1486	59	2	5.81358	0.197071
18	18.2011	10	2	0.549416	0.109883				18	8.96342	7	0	0.780952	0			18	12.7421	19	1.49112					18	15.9875	8	0.500391					19	10.4423	21	2	2.01106	0.191529						ave	2.17676	0.234018
19	14.9924	8	3	0.533604	0.200102				19	11.3574	5	0	0.440242	0			19	10.2604	11	1.07209					19	21.1123	7	0.33156					20	13.5892	34	2	2.502	0.147176						n	15	15
20	10.1424	8	1	0.78877	0.0985963				20	10.5479	2	0	0.189612	0			20	12.7877	15	1.173					20	21.4667	7	0.326087																stdev	0.918021	0.118819
																																												sem	0.237032	0.030679
			ave	0.873432	0.0957255							ave	0.766414	0.0799516					ave	0.986141							ave	0.369854								ave	2.44049	0.182031
			n	20	20							n	20	20					n	20							n	20								n	19	19
			stdev	0.352966	0.080544							stdev	0.387121	0.106694					stdev	1.18973							stdev	0.265138								stdev	1.19182	0.129288
			sem	0.0789256	0.0180102							sem	0.086563	0.0238575					sem	0.266032							sem	0.0592867								sem	0.273422	0.0296608
p36									p87
dendrite	dendrite length (um)	# spine synapses	#shaft synapses	spine syn/um	shaft syn/um				dendrite	dendrite length (µm)	# spine syn	#shaft syn	spine syn/um	shaft syn/um											p60								p3000								p3000
1290	10.6122	19	0	1.7904	0				1	10.5948	15	4	1.41579	0.377545											dendrite	dendrite length (µm)	# spine syn	spine syn/µm					Dendrite	dendrite length (µm)	# spine syn	#shaft syn	spine syn/µm	shaft syn/µm			Dendrite	dendrite length (µm)	# spine syn	#shaft syn	spine syn/µm	shaft syn/µm
302	11.7682	20	3	1.6995	0.254925				2	11.0351	14	3	1.26868	0.27186											24	9	16	1.77778					1	9.76939	9	2	0.921245	0.204721			1	9.5079	2	8	0.210351	0.841406
1378	14.0755	24	3	1.7051	0.213137				3	13.4205	12	3	0.894154	0.223538											26	14	24	1.71429					2	10.8256	7	2	0.646614	0.184747			2	11.0572	2	11	0.180877	0.994824
650	16.2022	16	4	0.987518	0.246879				4	14.0111	9	3	0.642346	0.214115											60	11	22	2					3	9.1285	9	2	0.985923	0.219094			3	10.3908	5	3	0.481194	0.288716
412	11.5086	19	1	1.65094	0.0868918				5	13.8233	18	4	1.30215	0.289366											70	13	27	2.07692					4	10.5828	9	2	0.85044	0.188987			4	11.0073	2	3	0.181697	0.272546
405	15.8839	18	1	1.13323	0.062957				6	12.0549	10	2	0.829538	0.165908											14	20	44	2.2					5	10.2017	10	2	0.980224	0.196045			5	10.6663	5	11	0.468766	1.03129
1528	9.66702	20	1	2.06889	0.103444				7	10.2902	18	3	1.74923	0.291539											48	12	19	1.58333					6	10.6726	6	0	0.562188	0			6	13.1209	4	8	0.304857	0.609715
1281	11.0241	21	7	1.90491	0.63497				8	13.9973	10	5	0.714423	0.357212											5	8	14	1.75					7	10.576	21	5	1.98562	0.472767			7	12.5806	2	9	0.158975	0.715388
1149	9.49845	20	1	2.10561	0.10528				9	9.9086	10	4	1.00922	0.40369											19	11	23	2.09091					8	10.1309	17	0	1.67803	0			8	8.97827	5	4	0.5569	0.44552
840	15.8929	14	2	0.880899	0.125843				10	17.4707	12	5	0.686864	0.286193											78	10	15	1.5					9	10.6651	9	2	0.843876	0.187528			9	11.4839	4	12	0.348312	1.04494
788	15.3465	22	2	1.43355	0.130323				11	12.6879	9	4	0.70934	0.315262											46	9	17	1.88889					10	10.6851	3	3	0.280764	0.280764			10	11.5274	4	4	0.347001	0.347001
392	11.7168	33	2	2.81647	0.170695				12	10.695	12	2	1.12202	0.187004											16	15	27	1.8					11	8.69394	6	2	0.690136	0.230045			11	11.787	2	3	0.169679	0.254518
650	8.92435	19	3	2.12901	0.336159				13	16.0174	9	4	0.561889	0.249728											15	14	31	2.21429					12	10.9115	7	0	0.641523	0			12	9.25385	5	1	0.540316	0.108063
1007	9.52029	16	2	1.68062	0.210078				14	14.739	13	5	0.882014	0.339236											52	11	22	2					13	10.5355	4	2	0.379669	0.189834			13	10.5375	3	2	0.284697	0.189798
132	9.87247	13	0	1.31679	0				15	13.2735	12	3	0.904057	0.226014											7	12	19	1.58333					14	10.4157	8	1	0.768069	0.0960086			14	8.44217	4	9	0.473812	1.06608
336	9.60972	17	2	1.76904	0.208123				16	18.5037	14	3	0.756605	0.16213																			15	9.59101	10	8	1.04264	0.834114			15	10.6723	4	2	0.374803	0.187402
395	10.4795	17	3	1.62221	0.286272				17	11.4088	10	2	0.876515	0.175303																			16	10.5762	6	2	0.567312	0.189104			16	10.3961	3	8	0.288571	0.769522
631	13.316	24	3	1.80235	0.225293				18	13.941	12	3	0.860773	0.215193													ave	1.86998					17	10.4106	8	0	0.768448	0			17	9.84547	4	3	0.406278	0.304709
526	22.7782	14	5	0.614623	0.219508				19	11.6988	13	1	1.11123	0.0854789													n	14					18	10.4919	10	0	0.953117	0			18	12.739	3	1	0.235498	0.0784994
625	13.3998	20	1	1.49256	0.074628				20	11.5813	12	4	1.03615	0.345384													stdev	0.233125					19	10.0755	9	0	0.893257	0			19	13.099	2	4	0.152683	0.305366
																											sem	0.0623053					20	10.4702	9	1	0.859583	0.0955092			20	11.7787	2	7	0.169798	0.594293
			ave	1.63021	0.18477							ave	0.96665	0.259085
			n	20	20							n	20	20																						ave	0.864934	0.178463						ave	0.316753	0.522479
			stdev	0.494534	0.140285							stdev	0.294273	0.0831289																						n	20	20						n	20	20
			sem	0.110581	0.0313687							sem	0.0658014	0.0185882																						stdev	0.390196	0.19702						stdev	0.135217	0.338354
																																				sem	0.0872505	0.0440549						sem	0.0302355	0.0756582
p105									p105
dendrite	dendrite length (um)	# spine syn	spine syn/um	dendrite	dendrite length (um)	#shaft syn	shaft syn/um		dendrite	dendrite length (µm)	# spine syn	#shaft syn	spine syn/um	shaft syn/um
1	10.8335	19	1.75382	1	9.83209	1	0.101708		1	10.6494	14	2	1.31463	0.187804
2	15.6818	20	1.27537	2	10.1	2	0.198019		2	9.2612	30	3	3.23932	0.323932
3	11.8152	27	2.2852	3	10.1306	3	0.296133		3	9.11197	10	2	1.09746	0.219491
4	12.5818	13	1.03324	4	10.1845	3	0.294565		4	9.50986	14	4	1.47216	0.420616
5	15.3199	37	2.41515	5	10.3464	2	0.193304		5	11.1698	17	4	1.52196	0.358108
6	14.6321	56	3.82721	6	10.5926	2	0.188811		6	10.7183	22	8	2.05257	0.74639
7	12.2416	19	1.55209	7	10.1158	2	0.197711		7	12.0249	14	1	1.16425	0.083161
8	13.9607	27	1.93401	8	10.4513	4	0.382727		8	10.3979	8	4	0.769382	0.384691
9	12.0253	20	1.66316	9	8.78062	2	0.227774		9	9.59797	10	3	1.04189	0.312566
10	11.6787	24	2.05503	10	9.92465	1	0.100759		10	9.4524	12	2	1.26952	0.211587
11	15.3962	24	1.55883	11	10.9553	1	0.09128		11	10.2158	20	3	1.95774	0.293662
12	13.2335	26	1.96471	12	10.3173	2	0.19385		12	9.73186	16	2	1.64408	0.205511
13	4.54879	21	4.61662	13	9.97021	0	0		13	9.84655	16	0	1.62493	0
14	13.754	19	1.38142	14	10.066	0	0		14	9.25351	12	3	1.29681	0.324201
15	12.9294	30	2.3203	15	10.0533	1	0.0994702		15	10.5019	22	1	2.09486	0.095221
16	12.1202	25	2.06268	16	9.97193	3	0.300845		16	9.35647	13	0	1.38941	0
17	15.385	21	1.36496	17	9.98495	1	0.100151		17	9.30206	21	4	2.25756	0.430012
18	10.3789	38	3.66128	18	10.0466	1	0.0995361		18	10.2689	54	4	5.25861	0.389527
19	15.2536	26	1.70452	19	10.2211	0	0		19	10.6683	12	0	1.12483	0
20	10.7189	9	0.839637	20	10.3851	5	0.481458		20	10.0091	12	2	1.19891	0.199818
		ave	2.06346			ave	0.177405
		n	20			n	20					ave	1.73954	0.259315
		stdev	0.982664			stdev	0.128399					n	20	20
		sem	0.21973			sem	0.0287108					stdev	0.996728	0.180982
												sem	0.222875	0.0404688
p523									p523
dendrite	dendrite length (um)	# spine synapses	#shaft synapses	spine syn/um	shaft syn/um				dendrite	dendrite length (um)	# spine synapses	#shaft synapses	spine syn/um	shaft syn/um
1	20.7907	12	1	0.577182	0.0480985				1	9.75375	6	1	0.615148	0.102525
2	19.1021	5	1	0.261752	0.0523503				2	12.8303	12	3	0.935283	0.233821
3	10.3767	9	2	0.867324	0.192739				3	10.1151	13	5	1.2852	0.494309
4	36.8074	2	5	0.0543369	0.135842				4	10.3527	13	1	1.25571	0.0965933
5	13.165	15	1	1.13938	0.0759589				5	10.488	11	2	1.04881	0.190693
6	71.8515	10	9	0.139176	0.125258				6	10.7137	12	1	1.12007	0.0933388
7	11.8201	12	5	1.01522	0.423009				7	11.5983	5	0	0.431098	0
8	15.0951	42	3	2.78237	0.198741				8	10.1444	8	3	0.788616	0.295731
9	25.7137	10	2	0.388897	0.0777794				9	9.74838	12	1	1.23097	0.102581
10	40.1478	9	8	0.224172	0.199264				10	10.2133	12	1	1.17493	0.0979111
11	40.2802	7	8	0.173783	0.198609				11	6.87056	17	0	2.47433	0
12	42.0189	6	1	0.142793	0.0237988				12	9.83155	9	12	0.91542	1.22056
13	33.248	16	2	0.481232	0.060154				13	11.386	12	3	1.05393	0.263482
14	20.5736	43	1	2.09006	0.048606				14	10.9921	16	3	1.45559	0.272923
15	12.8758	14	5	1.08731	0.388326				15	9.22129	11	1	1.19289	0.108445
16	23.574	3	6	0.127259	0.254518				16	9.94603	18	2	1.80977	0.201085
17	9.5281	12	3	1.25943	0.314858				17	9.35724	25	0	2.67173	0
18	38.6215	4	11	0.103569	0.284815				18	11.1438	4	5	0.358944	0.448679
19	13.3612	11	5	0.823281	0.374218				19	10.5989	8	0	0.754793	0
20	22.0042	12	1	0.545351	0.0454459				20	10.8705	9	4	0.827927	0.367967
			ave	0.714194	0.176119							ave	1.17006	0.229532
			n	20	20							n	20	20
			stdev	0.713323	0.127707							stdev	0.588006	0.275335
			sem	0.159504	0.0285562							sem	0.131482	0.0615669
Total spine and shaft synapses, respectively, counted for each data point in b-c are: mouse V1, p6 L2/3 = 2,35; p6 L4 = 6,40; p14 L2/3 = 190,22; p14 L4 = 155, 16; p36 L2/3 = 386,20; p36 L4 = 244,67; p105 L2/3 = 501, 81, p105 L4 = 349, 52; p523 L2/3 = 254, 80, p523 L4 = 233,48. Primate V1, p7 L2/3 = 68,28; p7 L4 = 140,43; p75 L2/3 = 526, 42; p75 L4 = 313, 33; p3000 L2/3 = 177,36; p3000 L4 = 67, 11…

## Sheet: Figure 2 b and c
dataset	branches_um	synapses_um
msp14	0.0902474	0.36099
msp14	0.107782	0.862253		ms = mouse
msp14	0.116801	0.817605		pr = primate		stats
msp14	0.149474	0.597898				Fig 2b				Fig 2c
msp14	0.0701351	0.490946				Mouse	Mean	± SEM		Mouse	Mean	± SEM
msp14	0.442134	2.21067				p14	0.71	0.09		p14	0.12	0.02
msp14	0	1.27454				p105	1.2	0.07		p105	0.22	0.02
msp14	0.236654	0.552192				p523	0.86	0.09		p523	0.15	0.02
msp14	0	2.7309
msp14	0	2.29211				Primate				Primate
msp14	0	0.744814				p7	0.93	0.1		p7	0.16	0.03
msp14	0	0.742496				p75	1	0.09		p75	0.38	0.04
msp14	0	0.868358				p3000	0.46	0.05		p3000	0.22	0.03
msp14	0.363116	0.363116
msp14	0	0.185244
msp14	0.186287	0.372574
msp14	0.156886	0.784428
msp14	0.320968	0.320968
msp14	0.217618	0.435235
msp14	0.178556	0.892782
msp14	0.157269	2.67357
msp14	0	0.541352		Total synapse counts for b are: mouse; p14 = 247, p105 = 852, p523 = 267 and primate; p7 = 187, p75 = 570, p3000 = 138, n = 50-60 axons/dataset
msp14	0	1.30199
msp14	0.209392	0.0697974
msp14	0	1.55831
msp14	0.105574	0.105574
msp14	0.0887298	0.798569
msp14	0	0.393794
msp14	0.104264	0.208527
msp14	0.164289	0.164289
msp14	0	0.491551
msp14	0.161049	0.644198
msp14	0	0.466401
msp14	0.383972	0.959929
msp14	0.17687	0.35374
msp14	0	0.372132
msp14	0.175208	0.087604
msp14	0	0.613065
msp14	0.218648	0.655944
msp14	0	0.175056
msp14	0	0.805185
msp14	0.264542	0.264542
msp14	0	0.603129
msp14	0.0777361	0.38868
msp14	0.110241	0.257229
msp14	0.222734	0.445468
msp14	0.434301	0.521161
msp14	0	0.414038
msp14	0.188633	0.5659
msp14	0	0.461144
msp105	0	1.10824
msp105	0.253575	0.887513
msp105	0	1.05888
msp105	0.0888373	0.97721
msp105	0.202661	0.810644
msp105	0.121506	1.21506
msp105	0.169989	1.01994
msp105	0.256177	1.48583
msp105	0.253052	1.26526
msp105	0.0861222	0.688978
msp105	0.103929	0.779465
msp105	0.239276	0.717828
msp105	0.163369	1.22527
msp105	0.502796	1.13129
msp105	0	2.44352
msp105	0.50292	1.2573
msp105	0.0942405	0.848164
msp105	0	0.438319
msp105	0.824994	2.47498
msp105	0.18604	1.67436
msp105	0.168587	0.842934
msp105	0.72567	1.55501
msp105	0.232286	0.929145
msp105	0.676532	2.0296
msp105	0.128229	0.769373
msp105	0.679792	1.6315
msp105	0.15567	0.778352
msp105	0	3.29361
msp105	0.539136	1.4377
msp105	0.344584	0.976322
msp105	0.225121	0.900484
msp105	0	0.606323
msp105	0.153675	0.922051
msp105	0.11471	0.860324
msp105	0.343326	1.83107
msp105	0.21711	0.723701
msp105	0.0766922	0.920307
msp105	0.628875	3.0745
msp105	0	1.57318
msp105	0	0.543752
msp105	0.204534	1.84081
msp105	0.438506	1.75402
msp105	0.228029	1.82424
msp105	0.286185	0.763159
msp105	0.149814	0.749071
msp105	0.134171	1.47588
msp105	0.510817	1.70272
msp105	0.231886	1.39132
msp105	0	0.874383
msp105	0.408589	1.08957
msp105	0	1.15073
msp105	0	1.40211
msp105	0	0.89238
msp105	0.488546	0.977093
msp105	0.216832	0.86733
msp105	0	0.705977
msp105	0.241296	1.84993
msp105	0	0.392306
msp105	0	0.848038
msp105	0	0.96468
msp105	0	1.24953
msp105	0	0.318134
msp105	0.4441	1.18427
msp105	0.474428	1.24255
msp105	0.153716	1.22973
msp105	0.136968	1.09574
msp105	0.303295	0.485272
msp105	0	0.643155
msp105	0.186697	1.05795
msp105	0.121653	0.608266
msp105	0.295515	1.47758
msp105	0.148704	1.78445
msp105	0.23046	1.22912
msp105	0.576056	1.72817
msp523	0.0704143	0.352071
msp523	0	0.614225
msp523	0.286442	0.716105
msp523	0	2.59439
msp523	0.406636	1.21991
msp523	0.154212	0.655402
msp523	0.783537	2.08943
msp523	0.309916	0.774791
msp523	0	3.44537
msp523	0.755978	1.13397
msp523	0	0.420841
msp523	0.128731	0.0643655
msp523	0.168589	0.252884
msp523	0.210659	1.26395
msp523	0.312344	0.832916
msp523	0.333746	1.00124
msp523	0	1.1179
msp523	0.263588	0.395382
msp523	0	2.07206
msp523	0.105131	0.525655
msp523	0	0.649584
msp523	0	0.575527
msp523	0.147716	0.590864
msp523	0	0.50874
msp523	0.17316	0.865802
msp523	0.0663488	0.398093
msp523	0	1.39802
msp523	0.37951	0.569265
msp523	0.217841	1.30705
msp523	0.0833477	0.583434
msp523	0	0.431563
msp523	0	0.826837
msp523	0.140831	1.05623
msp523	0	0.571422
msp523	0.289678	0.579356
msp523	0	0.941341
msp523	0.0656897	0.328449
msp523	0	1.83444
msp523	0.153248	0.612991
msp523	0.252345	0.50469
msp523	0	0.545732
msp523	0.206976	0.776161
msp523	0.335496	0.670992
msp523	0	0.397141
msp523	0.25662	0.51324
msp523	0	1.45044
msp523	0.105682	1.05682
msp523	0.126308	0.631538
msp523	0.267358	0.802073
msp523	0.155167	0.620668
msp523	0.110525	0.442099
msp523	0	0.353093
prp7	0.0895468	0.268641
prp7	0.128483	1.15634
prp7	0	2.09627
prp7	0.231247	0.69374
prp7	0.660007	0.99001
prp7	0.339305	2.71444
prp7	0.141918	0.0946121
prp7	0	1.71014
prp7	0.1056	1.3728
prp7	0	1.40032
prp7	0	1.10269
prp7	0.514809	1.80183
prp7	0	1.30129
prp7	0	4.12857
prp7	0.172746	0.863729
prp7	0.454279	1.36284
prp7	0.118121	1.77181
prp7	0	2.01046
prp7	0.85369	0.85369
prp7	0	0.924844
prp7	0.388289	0.970723
prp7	0.339991	0.339991
prp7	0.112834	0.677005
prp7	0.424787	1.27436
prp7	0.208878	0.939953
prp7	0.930772	0.930772
prp7	0	1.7715
prp7	0.231162	0
prp7	0	0.127891
prp7	0.202785	0
prp7	0	0.829752
prp7	0.178061	0.178061
prp7	0	0.963458
prp7	0	0
prp7	0.0675516	0.337758
prp7	0	1.20753
prp7	0.10865	0.10865
prp7	0	0.701943
prp7	0	0.559186
prp7	0.106516	0.426064
prp7	0.181545	0.181545
prp7	0.202478	0
prp7	0	0.395804
prp7	0	0.245272
prp7	0	0.702491
prp7	0	0
prp7	0	0.977261
prp7	0	1.51802
prp7	0	0.872541
prp7	0.301165	0.60233
prp75	0.275425	0.780372
prp75	0.437996	1.00113
prp75	0	0.781585
prp75	0.371318	2.22791
prp75	0.583479	0.486232
prp75	0	0.175673
prp75	0.208102	0.332964
prp75	0	0.97715
prp75	0.277794	0.833381
prp75	0.0628433	0.37706
prp75	0.805875	3.06232
prp75	0.343173	0.617712
prp75	0.350959	0.350959
prp75	0.0780651	0.936781
prp75	0.890868	1.3363
prp75	0	1.33005
prp75	0	0.22292
prp75	0.31355	1.09742
prp75	0.364397	0.485862
prp75	0.145434	0.290867
prp75	0.96187	0.96187
prp75	0.399715	1.7321
prp75	0.122024	0.976188
prp75	0.559689	0.602742
prp75	0	0.620545
prp75	0.0532148	0.0532148
prp75	0.46549	0.46549
prp75	0.418844	1.46595
prp75	1.08911	1.08911
prp75	0.592155	1.18431
prp75	0.170774	0.341547
prp75	0	0.205502
prp75	0.609278	1.5232
prp75	0.983369	1.68578
prp75	0.477611	0.668656
prp75	0.891681	1.04029
prp75	0.460365	1.28902
prp75	0.220325	1.10163
prp75	0.343031	1.20061
prp75	0.648543	1.47724
prp75	0.737518	0.798978
prp75	0.467059	1.55686
prp75	0.610126	1.26383
prp75	0.495463	1.56261
prp75	0	0.682095
prp75	0.412409	1.17831
prp75	0.224026	3.36039
prp75	0.227596	0.625889
prp75	0.516368	1.18027
prp75	0.211839	0.70613
prp3000	0	0.300827
prp3000	0.249357	0.498713
prp3000	0	0.307103
prp3000	0.197831	0.593494
prp3000	0.124615	0.124615
prp3000	0	0.0931345
prp3000	0.277484	0.832453
prp3000	0.551909	1.37977
prp3000	0.407168	0.407168
prp3000	0.203557	0.101778
prp3000	0.188295	0.753181
prp3000	0	0.931175
prp3000	0	1.95712
prp3000	0	0.504452
prp3000	0.579291	0.289646
prp3000	0.409551	0.409551
prp3000	0	0.3002
prp3000	0.401835	0.80367
prp3000	0.131169	0.655844
prp3000	0.360794	0.360794
prp3000	0.133584	0.311697
prp3000	0	0.257732
prp3000	0.220398	0.440796
prp3000	0	0.469346
prp3000	0	0.211356
prp3000	0.155881	0.311761
prp3000	0.289602	0.144801
prp3000	0.494566	0.123641
prp3000	0.669471	0.669471
prp3000	0.421133	0.701888
prp3000	0.264601	0.264601
prp3000	0	0.0829265
prp3000	0.466997	0.466997
prp3000	0.481431	0.240715
prp3000	0.465594	0.465594
prp3000	0	0.269325
prp3000	0.287903	0.107964
prp3000	0.164332	0.164332
prp3000	0.281657	0.168994
prp3000	0	0.27839
prp3000	0	0.765869
prp3000	0.305301	0.152651
prp3000	0.125176	0.250352
prp3000	0	0.456882
prp3000	0.54354	0.36236
prp3000	0	0.321728
prp3000	0.682484	1.02373
prp3000	0.125534	0.125534
prp3000	0.210184	0.840736
prp3000	0	0.744013

## Sheet: Figure 3b and c
Fig 3b
			syn/soma
species	layer	age	ave	stdev	sem		syn/sa	sem
mouse	23	6	1.16667	0.752773	0.307318		0.00253902	0.000731234
mouse	23	14	25.8333	8.47152	3.45848		0.0451055	0.00815668
mouse	23	36	66		3.8
mouse	23	105	72.2222	15.3849	5.12829		0.174429	0.0062158
mouse	23	523	79.1667	17.509	7.14804		0.12886	0.0104151
primate	23	7	15.8333	5.19294	2.12001		0.0353107	0.00502793
primate	23	75	50.3333	9.93311	4.05518		0.107917	0.0116969
primate	23	3000	16.125	5.86606	2.07397		0.0430451	0.00658827
mouse	4	6	2.16667	2.56255	1.04616		0.00422167	0.00209439
mouse	4	14	11.25	2.75379	1.37689		0.0214118	0.00370345
mouse	4	87	38		0.82
mouse	4	105	42.8537	29.1604	4.55409		0.103762
mouse	4	523	53.8333	18.2583	7.45393		0.0677531	0.0183686
primate	4	7	23.5	6.71565	2.74165		0.0521677	0.00931221
primate	4	75	32.6667	11.9276	4.86941		0.0693739	0.00525772
primate	4	3000	14.1667	3.3116	1.35195		0.0416172	0.00453536
Fig 3c
species	layer	age	ave # axons/soma	stddev	sem
mouse	23	14	17.25	4.99166	2.49583
mouse	23	105	33	5.61249	2.50998
mouse	23	523	39.25	2.06155	1.03078
primate	23	7	13.25	5.31507	2.65754
primate	23	75	22.4	3.50714	1.56844
primate	23	3000	12.5	3.72827	1.52206
b, n = ≥ 6 soma/dataset. c, n = all soma-innervating axons across ≥ 4 soma/dataset. e, n = ≥40 boutons/dataset. Total synapse counts for b: mouse V1, p6 L2/3 = 6, L4 = 6; p14 L2/3 = 155, L4 = 45; p105 L2/3 = 650, L4 = 1757; p523 L2/3 = 476, L4 = 323. primate V1, p7 L2/3 = 95, L4 = 141; p75 L2/3 = 302, L4 = 196; p3000 L2/3 = 129, L4 = 85. For e: mouse V1 L2/3 p14 = 50, p105 = 84, p523 = 50; primat…

## Sheet: Figure 3e
Mouse_p14_v1_L23		radius (pixels)	radius (um)	volume (um^3)			Mouse_p105_v1_L23		radius (pixels)	radius (um)	volume (um^3)			Mouse_p523_v1_L23		radius (pixels)	radius (um)	volume (um^3)					Primate_p7_v1_l23		radius (pixels)	radius (um)	volume (um^3)		Primate_p75_v1_l23		radius (pixels)	radius (um)	volume (um^3)			Primate_p3000_v1_l23		radius (pixels)	radius (um)	volume (um^3)
	soma syn bouton radius	59	0.354	0.185728				soma syn bouton radius	52.9979	0.317987	0.134616				soma syn bouton radius	73.0969	0.438581	0.353199						soma syn bouton radius	50.7617	0.30457	0.118285			soma syn bouton radius	50.7617	0.30457	0.118285				soma syn bouton radius	82.8092	0.496855	0.513521
		46	0.276	0.0880229					26.6234	0.15974	0.0170652					42.3014	0.253808	0.068452							50.7617	0.30457	0.118285				40.6094	0.243656	0.0605622					50.878	0.305268	0.1191
		60	0.36	0.195333					38.3318	0.229991	0.050933					58.4775	0.350865	0.180838							60.9141	0.365485	0.204398				50.7617	0.30457	0.118285					61.9174	0.371504	0.214664
		49	0.294	0.106392					51.0106	0.306064	0.120034					73.0969	0.438581	0.353199							50.7617	0.30457	0.118285				42.3014	0.253808	0.068452					74.3008	0.445805	0.37094
		57	0.342	0.167474					58.9824	0.353894	0.185562					73.0969	0.438581	0.353199							60.9141	0.365485	0.204398				73.0969	0.438581	0.353199					92.8761	0.557257	0.724493
		71	0.426	0.323666					65.2298	0.391379	0.250992					87.7163	0.526298	0.610328							17	0.102	0.00444292				42.3014	0.253808	0.068452					61.9174	0.371504	0.214664
		59	0.354	0.185728					55.2061	0.331237	0.152154					73.0969	0.438581	0.353199							42.3014	0.253808	0.068452				50.7617	0.30457	0.118285					77.3967	0.46438	0.419266
		74	0.444	0.366452					50.878	0.305268	0.1191					60.9141	0.365485	0.204398							35.2512	0.211507	0.0396136				60.9141	0.365485	0.204398					67.1846	0.403108	0.27424
		74	0.444	0.366452					55.2061	0.331237	0.152154					42.3014	0.253808	0.068452							29.376	0.176256	0.0229245				50.7617	0.30457	0.118285					80.6216	0.483729	0.473888
		59	0.354	0.185728					61.0536	0.366322	0.205805					60.9141	0.365485	0.204398							10.88	0.06528	0.00116469				60.9141	0.365485	0.204398					67.1846	0.403108	0.274241
		85	0.51	0.555366					24.079	0.144474	0.0126251					60.9141	0.365485	0.204398							42.3014	0.253808	0.068452				50.7617	0.30457	0.118285					46.656	0.279936	0.0918427
		74	0.444	0.366452					45.2985	0.271791	0.0840569					73.0969	0.438581	0.353199							50.7617	0.30457	0.118285				42.3014	0.253808	0.068452					67.1846	0.403108	0.274241
		74	0.444	0.366452					58.9824	0.353894	0.185562					60.9141	0.365485	0.204398							13.6	0.0816	0.00227478				50.7617	0.30457	0.118285					40.5	0.243	0.0600741
		74	0.444	0.366452					88.4736	0.530842	0.626272					48.7313	0.292388	0.104652							20.4	0.1224	0.00767737				60.9141	0.365485	0.204398					71.3288	0.427973	0.328184
		49	0.294	0.106392					49.152	0.294912	0.107386					33.8411	0.203047	0.0350474							35.2512	0.211507	0.0396136				50.7617	0.30457	0.118285					67.1846	0.403108	0.274241
		71	0.426	0.323666					73.728	0.442368	0.362426					73.0969	0.438581	0.353199							50.7617	0.30457	0.118285				60.9141	0.365485	0.204398					53.7477	0.322486	0.140411
		52	0.312	0.127155					61.44	0.36864	0.209737					73.0969	0.438581	0.353199							42.3014	0.253808	0.068452				87.7163	0.526298	0.610328					83.9808	0.503885	0.535627
		62	0.372	0.215525					61.44	0.36864	0.209737					73.0969	0.438581	0.353199							42.3014	0.253808	0.068452				50.7617	0.30457	0.118285					70	0.42	0.310182
		49	0.294	0.106392					84.9347	0.509608	0.554086					50.7617	0.30457	0.118285							42.3014	0.253808	0.068452				87.7163	0.526298	0.610328					67.2	0.4032	0.274429
		89	0.534	0.637518					61.44	0.36864	0.209737					73.0969	0.438581	0.353199							35.2512	0.211507	0.0396136				50.7617	0.30457	0.118285					52.0106	0.312064	0.127232
		62	0.372	0.215525					47.1859	0.283115	0.0950077					50.7617	0.30457	0.118285							42.3014	0.253808	0.068452				60.9141	0.365485	0.204398					71.6636	0.429982	0.332827
		40	0.24	0.0578765					60.1158	0.360695	0.196466					48.7313	0.292388	0.104652							42.3014	0.253808	0.068452				42.3014	0.253808	0.068452					64.512	0.387072	0.242797
		52	0.312	0.127155					48.8429	0.293057	0.105372					60.9141	0.365485	0.204398							42.3014	0.253808	0.068452				42.3014	0.253808	0.068452					80.64	0.48384	0.474213
		62	0.372	0.215525					39.0742	0.234445	0.0539503					42.3014	0.253808	0.068452							20.4	0.1224	0.00767737				42.3014	0.253808	0.068452					57.0761	0.342457	0.168145
		62	0.372	0.215525					70	0.42	0.310182					73.0969	0.438581	0.353199							35.2512	0.211507	0.0396136				50.7617	0.30457	0.118285					51.6096	0.309658	0.124312
		59	0.354	0.185728					64.512	0.387072	0.242797					50.7617	0.30457	0.118285							42.3014	0.253808	0.068452				50.7617	0.30457	0.118285					74.8952	0.449371	0.379913
		49	0.294	0.106392					49.5452	0.297271	0.109983					60.9141	0.365485	0.204398							29.376	0.176256	0.0229245				42.3014	0.253808	0.068452					43.3422	0.260053	0.0736299
		52	0.312	0.127155					82.1896	0.493137	0.502079					50.7617	0.30457	0.118285							24.48	0.14688	0.0132665				42.3014	0.253808	0.068452					43.3422	0.260053	0.07363
		74	0.444	0.366452					60.5967	0.36358	0.201219					60.9141	0.365485	0.204398							29.376	0.176256	0.0229245				42.3014	0.253808	0.068452					47.933	0.287598	0.0995924
		59	0.354	0.185728					74.3178	0.445907	0.371194					60.9141	0.365485	0.204398							35.2512	0.211507	0.0396136				50.7617	0.30457	0.118285					71.8995	0.431397	0.336124
		59	0.354	0.185728					56	0.336	0.158813					42.3014	0.253808	0.068452							50.7617	0.30457	0.118285				42.3014	0.253808	0.068452					62.4127	0.374476	0.219858
		76	0.456	0.396975					56	0.336	0.158813					87.7163	0.526298	0.610328							35.2512	0.211507	0.0396136				50.7617	0.30457	0.118285					36.1185	0.216711	0.0426099
		89	0.534	0.637518					35.84	0.21504	0.0416319					60.9141	0.365485	0.204398							35.2512	0.211507	0.0396136				48.7313	0.292388	0.104652					69.0235	0.414141	0.297381
		64	0.384	0.237062					56	0.336	0.158813					60.9141	0.365485	0.204398							42.3014	0.253808	0.068452				60.9141	0.365485	0.204398					86.2793	0.517676	0.580821
		49	0.294	0.106392					51.6096	0.309658	0.124312					60.9141	0.365485	0.204398							60.9141	0.365485	0.204398				50.7617	0.30457	0.118285					86.2793	0.517676	0.58082
		49	0.294	0.106392					47.5634	0.28538	0.0973063					42.3014	0.253808	0.068452							42.3014	0.253808	0.068452				60.9141	0.365485	0.204398					54.1777	0.325066	0.143808
		102	0.612	0.959672					77.4144	0.464486	0.419554					87.7163	0.526298	0.610328							42.3014	0.253808	0.068452				60.9141	0.365485	0.204398					52.0106	0.312064	0.127232
		39	0.234	0.0536434					80.64	0.48384	0.474213					60.9141	0.365485	0.204398							42.3014	0.253808	0.068452				60.9141	0.365485	0.204398					67.1846	0.403108	0.274241
		68	0.408	0.284347					56	0.336	0.158813					87.7163	0.526298	0.610328							29.376	0.176256	0.0229245				60.9141	0.365485	0.204398					15.2882	0.0917294	0.00323143
		71	0.426	0.323666					43.008	0.258048	0.0719399					87.7163	0.526298	0.610328							48.7313	0.292388	0.104652				50.7617	0.30457	0.118285					75.7286	0.454371	0.392737
		78	0.468	0.429147					61.9315	0.371589	0.214811					87.7163	0.526298	0.610328							60.9141	0.365485	0.204398				35.2512	0.211507	0.0396136					83.9808	0.503885	0.535627
		59	0.354	0.185728					44.8	0.2688	0.0813123					60.9141	0.365485	0.204398							50.7617	0.30457	0.118285				73.0969	0.438581	0.353199					38.88	0.23328	0.0531497
		59	0.354	0.185728					47.5634	0.285381	0.0973065					87.7163	0.526298	0.610328							50.7617	0.30457	0.118285				60.9141	0.365485	0.204398					46.656	0.279936	0.0918427
		71	0.426	0.323666					67.2	0.4032	0.274429					73.0969	0.438581	0.353199							50.7617	0.30457	0.118285				60.9141	0.365485	0.204398					34.7089	0.208254	0.0378134
		68	0.408	0.284347					67.2	0.4032	0.274429					73.0969	0.438581	0.353199							42.3014	0.253808	0.068452				48.7313	0.292388	0.104652
		38	0.228	0.0496218					84	0.504	0.535994					87.7163	0.526298	0.610328							50.7617	0.30457	0.118285				73.0969	0.438581	0.353199
		48	0.288	0.100011					67.2	0.4032	0.274429					87.7163	0.526298	0.610328							60.9141	0.365485	0.204398				42.3014	0.253808	0.068452
		40	0.24	0.0578765					107.018	0.642106	1.10838					73.0969	0.438581	0.353199							50.7617	0.30457	0.118285				42.3014	0.253808	0.068452
		30	0.18	0.0244166					70	0.42	0.310182					70.173	0.421038	0.312487							60.9141	0.365485	0.204398				48.7313	0.292388	0.104652
		41	0.246	0.0623266					67.2	0.4032	0.274429					73.0969	0.438581	0.353199							50.7617	0.30457	0.118285				50.7617	0.30457	0.118285
									70	0.42	0.310182
									70	0.42	0.310182
									80.64	0.48384	0.474213
									61.9315	0.371589	0.214811
									52.6013	0.315608	0.131617
									56	0.336	0.158813
									67.2	0.4032	0.274429
									80.64	0.48384	0.474213
									77.4144	0.464486	0.419554
									70	0.42	0.310182
									44.8	0.2688	0.0813123
									61.9315	0.371589	0.214811
									74.3178	0.445907	0.371194
									64.512	0.387072	0.242797
									53.76	0.32256	0.140508
									41.2877	0.247726	0.0636478
									53.76	0.32256	0.140508
									77.4144	0.464486	0.419554
									84	0.504	0.535994
									67.2	0.4032	0.274429
									43.008	0.258048	0.0719399
									64.512	0.387072	0.242797
									96.768	0.580608	0.81944
									51.6096	0.309658	0.124312
									39.6362	0.237817	0.0563115
									64.512	0.387072	0.242797
									64.512	0.387072	0.242797
									80.64	0.48384	0.474213
									57.0761	0.342457	0.168145
									61.9315	0.371589	0.214811
									85.6141	0.513685	0.56749
									67.2	0.4032	0.274429
									84	0.504	0.535994
									77.4144	0.464486	0.419554

## Sheet: Fig 4d-f
Fig 4d	synapses/µm				Fig. 4e	filopodia/µm		Fig. 4f	total synapses/soma
Mouse p14	0.43 ± 0.11	n= 88 dendrites			Mouse p14	0.075 ± 0.038,		Mouse p14	18.31 ± 12.15	n = 39 soma
Mouse p105	0.69 ± 0.16	n = 107 dendrites,			Mouse p105	0.005 ± 0.008		Mouse p105	42.85 ± 28.80	n = 41 soma
p = 6.17e-26.					p = 4.43e-32			p=2.65e-8

## Sheet: Supp Fig 2a-d
Supp Fig 2a Mouse V1, L2/3						Supp Fig 2b Mouse V1, L4					Supp Fig 2c Primate V1, L2/3					Supp Fig 2c Primate V1, L4
Mouse p6						Mouse p6					Primate p7					Primate p7
dendrite	ave diameter (um)	spine syn/um				dendrite	ave diameter um	spine syn/µm			dendrite	ave diameter um	spine syn/µm			dendrite	ave diameter um	spine syn/µm
01_Eden *	0.548147	0				randDen01 *	1.06876	0			1	0.36151	0.307841			1	0.642801	0.65956
02_Eden *	1.23113	0.130821				randDen02 *	1.53332	0.0685591			2	0.348216	0.156576			2	0.483207	0.701394
03_Eden *	0.450378	0				randDen03 *	0.879393	0.0136562			3	0.448499	0.0720138			3	0.438528	0.104215
04_Eden *	0.76512	0				randDen04 *	0.999822	0			4	1.16837	0.645871			4	0.252481	0.39637
05_Eden *	0.9648	0				randDen05 *	0.338798	0			5	0.270135	0.31013			5	0.671059	1.02932
06_Eden *	0.551098	0				randDen06 *	0.896694	0			6	0.324223	0.216494			6	0.551615	1.16896
07_Eden *	0.443309	0				randDen07 *	0.838208	0			7	0.285882	0.489281			7	0.811761	0.759292
08_Eden *	0.405017	0				randDen08 *	0.864631	0			8	0.654144	0.0610111			8	0.539094	0.0890122
09_Eden *	0.856864	0				randDen09 *	0.522463	0			9	0.866288	0.413063			9	0.283002	0.431201
10_Eden *	1.09696	0				randDen11 *	0.529418	0			10	0.49061	0.319459			10	0.377862	0.95517
11_Eden *	0.246023	0				randDen12 *	0.456146	0			11	0.648623	0			11	0.769186	1.16915
12_Eden *	0.969985	0				radnden13	2.1642	0			12	0.667345	0.792343			12	0.297159	0.621158
13_Eden *	0.528017	0				randden14 *	0.985253	0			13	0.451505	0.612812			13	0.364686	1.00896
14_Eden *	0.507095	0				randden15 *	2.1274	0.0786329			14	0.471547	0			14	0.588215	0.333783
15_Eden *	0.770169	0				randden16 *	0.627863	0			15	0.514688	0.484968			15	0.287214	0.354684
16_Eden *	0.19822	0				randden17 *	0.546214	0			16	0.434343	0.0854411			16	0.399869	0.592791
17_Eden *	0.913566	0				randden18 *	0.48577	0.107668			17	0.358596	0.190134			17	0.411288	1.13562
18_Eden *	0.778811	0				randden19 *	0.362355	0.071305			18	0.480335	0.203022			18	0.459516	0.937914
19_Eden *	0.654338	0				randden20 *	0.402306	0			19	0.241327	0.253108			19	0.369469	0.558779
20_Eden *	0.916112	0									20	0.631983	0.551012			20	0.838001	0
Mouse p14						Mouse p14					Primate p75					Primate p75
dendrite	ave diameter (um)	spine syn/um				dendrite	ave diameter um	spine syn/um			dendrite	ave diameter um	spine syn/µm			dendrite	ave diameter um	spine syn/µm
1	0.347362	0.961476				1	0.212751	0.30795			2	0.581856	0.709359			1	1.07869	0.585313
2	0.959966	0.9964				2	0.494264	0.474509			3	1.35444	4.0013			2	0.658097	2.48881
3	0.362169	0.479503				3	0.977109	0.301982			4	1.12957	4.35386			3	0.595295	2.49116
4	0.619117	0.662293				4	0.507608	0.288396			5	0.617205	2.03514			4	0.54934	2.44758
5	0.435715	1.19288				5	0.47286	0.465212			6	1.1935	1.92358			5	0.623967	1.44742
6	0.861146	1.3551				6	0.559204	1.04886			7	0.506742	1.89709			6	0.688077	2.15008
7	0.517066	1.20217				7	1.02773	1.0128			8	0.38286	1.21061			7	0.492718	1.60112
8	0.352505	0.923618				8	0.462947	1.07588			9	1.2774	2.61608			8	0.498857	2.49127
9	0.741151	0.992371				9	0.329055	1.30195			10	0.324258	2.22745			9	0.731703	1.84022
10	0.332538	0.511101				10	0.32149	0.988753			11	0.531444	1.66075			10	0.631056	2.88474
11	0.377279	1.12246				11	0.446178	0.800417			12	0.430525	2.87042			11	0.545273	4.66682
12	1.1689	1.6349				12	0.427444	0.544896			13	0.612466	2.33333			12	0.848812	1.24629
13	0.442636	0.899534				13	0.684643	1.25694			14	0.558247	2.89861			13	0.606878	1.63063
14	0.373698	0.190547				14	1.17692	1.00299			15	1.04697	1.40446			14	0.469297	2.3147
15	1.01643	1.17259				15	0.518773	1.42751			16	0.6647	1.84053			15	0.483593	2.3653
16	0.351163	0.530509				16	0.982098	0.479234			17	0.630525	2.06004
17	0.483099	0.769399				17	0.421342	1.13919			18	1.50989	5.81358
18	0.460405	0.549416				18	0.467145	0.780952			19	0.40558	2.01106
19	0.658801	0.533604				19	1.16551	0.440242			20	0.59162	2.502
20	0.385789	0.78877				20	0.390328	0.189612
Mouse p36						Mouse p87					Primate p3000					Primate p3000
dendrite	ave diameter (um)	spine syn/um				dendrite	ave diameter um	spine syn/um			dendrite	ave diameter um	spine syn/µm			dendrite	ave diameter um	spine syn/µm
1290	0.775	1.7904				1	0.6875	1.41579			1	0.380849	0.921245			1	0.559078	0.210351
302	0.375	1.6995				2	0.45	1.26868			2	0.562989	0.646614			2	0.747572	0.180877
1378	0.55	1.7051				3	0.75	0.894154			3	0.603616	0.985923			3	0.312644	0.481194
650	0.7875	0.987518				4	0.55	0.642346			4	0.657795	0.85044			4	0.790202	0.181697
412	0.55	1.65094				5	0.475	1.30215			5	1.18896	0.980224			5	0.45432	0.468766
405	0.525	1.13323				6	0.625	0.829538			6	1.60983	0.562188			6	0.965662	0.304857
1528	0.4875	2.06889				7	0.625	1.74923			7	1.23577	1.98562			7	0.422179	0.158975
1281	1.425	1.90491				8	0.7	0.714423			8	0.943992	1.67803			8	0.466602	0.5569
1149	0.4375	2.10561				9	0.4	1.00922			9	0.473303	0.843876			9	0.620324	0.348312
840	0.75	0.880899				10	0.475	0.686864			10	0.218986	0.280764			10	0.545039	0.347001
788	1.225	1.43355				11	0.4	0.70934			11	0.595955	0.690136			11	0.605057	0.169679
392	0.8625	2.81647				12	0.625	1.12202			12	0.474275	0.641523			12	0.368068	0.540316
650	0.4	2.12901				13	0.55	0.561889			13	0.412603	0.379669			13	0.55997	0.284697
1007	0.5125	1.68062				14	0.425	0.882014			14	0.373809	0.768069			14	0.473586	0.473812
132	0.4375	1.31679				15	0.95	0.904057			15	0.590436	1.04264			15	0.543489	0.374803
336	0.425	1.76904				16	0.6	0.756605			16	0.362862	0.567312			16	0.853738	0.288571
395	0.5	1.62221				17	0.475	0.876515			17	0.397057	0.768448			17	0.385354	0.406278
631	0.35	1.80235				18	0.575	0.860773			18	0.271376	0.953117			18	0.602457	0.235498
526	0.9375	0.614623				19	0.7375	1.11123			19	0.93619	0.893257			19	0.618368	0.152683
625	0.8375	1.49256				20	0.625	1.03615			20	0.549001	0.859583			20	0.645171	0.169798
Mouse p105						Mouse p105
dendrite	ave diameter (um)	spine syn/um				dendrite	ave diameter (um)	spine syn/um
1	0.596123	1.75382				1	0.308008	1.31463
2	0.414718	1.27537				2	1.00017	3.23932
3	0.603285	2.2852				3	0.359805	1.09746
4	0.585119	1.03324				4	0.465806	1.47216
5	0.496929	2.41515				5	0.524383	1.52196
6	1.12156	3.82721				6	0.996106	2.05257
7	0.462614	1.55209				7	0.34275	1.16425
8	0.481435	1.93401				8	0.344184	0.769382
9	0.562799	1.66316				9	0.386924	1.04189
10	0.644256	2.05503				10	1.06726	1.26952
11	0.32961	1.55883				11	0.928211	1.95774
12	0.389704	1.96471				12	0.847029	1.64408
13	0.569656	4.61662				13	0.343239	1.62493
14	0.472717	1.38142				14	0.344184	1.29681
15	0.541546	2.3203				15	0.627429	2.09486
16	0.460649	2.06268				16	0.472342	1.38941
17	0.537062	1.36496				17	0.666644	2.25756
18	1.50409	3.66128				18	1.8649	5.25861
19	0.515615	1.70452				19	0.300215	1.12483
20	0.376919	0.839637				20	0.44868	1.19891
Mouse p523						Mouse p523
dendrite	ave diameter (um)	spine syn/um				dendrite	ave diameter (um)	spine syn/um
1	0.463645	0.577182				1	1.02773	0.615148
2	0.449172	0.261752				2	0.55717	0.935283
3	0.451793	0.867324				3	0.444976	1.2852
4	0.737647	0.0543369				4	0.940541	1.25571
5	0.481579	1.13938				5	0.63116	1.04881
6	1.25287	0.139176				6	0.713701	1.12007
7	0.560877	1.01522				7	0.563387	0.431098
8	1.95237	2.78237				8	0.555536	0.788616
9	0.433608	0.388897				9	1.01644	1.23097
10	0.860843	0.224172				10	0.439512	1.17493
11	0.847791	0.173783				11	0.62841	2.47433
12	0.416616	0.142793				12	0.591882	0.91542
13	0.509009	0.481232				13	0.439552	1.05393
14	2.14762	2.09006				14	0.539197	1.45559
15	1.44004	1.08731				15	0.523675	1.19289
16	0.758309	0.127259				16	0.920438	1.80977
17	0.597629	1.25943				17	0.726919	2.67173
18	2.10856	0.103569				18	0.329948	0.358944
19	1.77488	0.823281				19	0.512625	0.754793
20	0.660878	0.545351				20	0.702407	0.827927

## Sheet: Supp Fig 3a
dataset	branches_um	synapses_um	vesicle_number
mouse_p6_V1_L23	0	0.74105	3
mouse_p6_V1_L23	0	0.44756	3
mouse_p6_V1_L23	0	1.7736	20
mouse_p6_V1_L23	0	1.71235	12
mouse_p6_V1_L23	0	1.74035	15
mouse_p6_V1_L23	0.234777	0.234777	13
mouse_p6_V1_L23	0	0.57977	40
mouse_p6_V1_L23	0.260138	0.520275	19
mouse_p6_V1_L23	0.478419	0.956837	70
mouse_p6_V1_L23	0	0.961636	33
mouse_p6_V1_L23	0	0.934462	27
mouse_p6_V1_L23	0	0.662934	36
mouse_p6_V1_L23	0	0.329444	39
mouse_p6_V1_L23	0	4.61709	4
mouse_p6_V1_L23	0	0.607347	6
mouse_p6_V1_L23	0.250734	0.334312	23
mouse_p6_V1_L23	0	0.703078	3
mouse_p6_V1_L23	0	1.28716	7
mouse_p6_V1_L23	0	0.376468	40
mouse_p6_V1_L23	0	0.51284	6
mouse_p6_V1_L23	0	2.59369	38
mouse_p6_V1_L23	0	1.13039	10
mouse_p6_V1_L23	0.217744	1.30646	6
mouse_p6_V1_L23	0.814771	0.543181	15
mouse_p6_V1_L23	0.150099	0.900594	135
mouse_p6_V1_L23	0	0.248371	30
mouse_p6_V1_L23	0	1.47508	3
mouse_p6_V1_L23	0	0.399293	70
mouse_p6_V1_L23	0	0.790591	16
mouse_p6_V1_L23	0.153574	0.614295	91
mouse_p6_V1_L23	0.258216	0.516432	50
mouse_p6_V1_L23	0	0.244067	90
mouse_p6_V1_L23	0	0.104517	23
mouse_p6_V1_L23	0	2.64337	5
mouse_p6_V1_L23	0	0.552878	38
mouse_p6_V1_L23	0	0.605733	18
mouse_p6_V1_L23	0	0.421434	6
mouse_p6_V1_L23	0	2.65126	60
mouse_p6_V1_L23	0	2.02703	10
mouse_p6_V1_L23	0	2.14024	17
mouse_p6_V1_L23	0.190068	0.570203	13
mouse_p6_V1_L23	0	0.525565	14
mouse_p6_V1_L23	0	3.99627	6
mouse_p6_V1_L23	0.584125	1.16825	73
mouse_p6_V1_L23	0	1.3847	20
mouse_p6_V1_L23	0.599797	2.39919	8
mouse_p6_V1_L23	0	0.835979	9
mouse_p6_V1_L23	0	0.726455	24
mouse_p6_V1_L23	0	0.407864	14
mouse_p6_V1_L23	0.163585	0.654341	5
mouse_p6_V1_L23			12
mouse_p6_V1_L23			4
mouse_p6_V1_L23			23
mouse_p6_V1_L23			160
mouse_p6_V1_L23			20
mouse_p6_V1_L23			32
mouse_p6_V1_L23			24
mouse_p6_V1_L23			6
mouse_p6_V1_L23			40
mouse_p6_V1_L23			60
mouse_p6_V1_L23			12
mouse_p6_V1_L23			22
mouse_p6_V1_L23			13
mouse_p6_V1_L23			50
mouse_p6_V1_L23			9
mouse_p6_V1_L23			100
mouse_p6_V1_L23			13
mouse_p6_V1_L23			12
mouse_p6_V1_L23			50
mouse_p6_V1_L23			15
mouse_p6_V1_L23			12
mouse_p6_V1_L23			36
mouse_p6_V1_L23			60
mouse_p6_V1_L23			70
mouse_p6_V1_L23			40
mouse_p6_V1_L23			13
mouse_p6_V1_L23			3
mouse_p6_V1_L23			20
mouse_p6_V1_L23			6
mouse_p6_V1_L23			20
mouse_p6_V1_L23			4
mouse_p6_V1_L23			35
mouse_p6_V1_L23			18
mouse_p6_V1_L23			30
mouse_p6_V1_L23			27
mouse_p6_V1_L23			20
mouse_p6_V1_L23			80
mouse_p6_V1_L23			20
mouse_p6_V1_L23			30
mouse_p6_V1_L23			7
mouse_p6_V1_L23			45
mouse_p6_V1_L23			5
mouse_p6_V1_L23			30
mouse_p6_V1_L23			22
mouse_p6_V1_L23			12
mouse_p6_V1_L23			14
mouse_p6_V1_L23			6
mouse_p6_V1_L23			35
mouse_p6_V1_L23			30
mouse_p6_V1_L23			4
mouse_p6_V1_L23			5
mouse_p6_V1_L23			35
mouse_p6_V1_L23			22
mouse_p6_V1_L23			18
mouse_p6_V1_L23			22
mouse_p6_V1_L23			6
mouse_p6_V1_L23			60
mean	0.0871209	1.09222	27.4299
stdev	0.181992	0.947908	27.2276
n	50	50	107
sem	0.0257376	0.134054	2.63219

## Sheet: Supp Fig 7
	PSD size (µm^3)			vesicle cloud size (µm^3)
	mean±sem	n		mean±sem	n
mouse p14	0.0028 ± 2.6e-5	6732		0.035 ± 6.4e-4	6780
mouse p015	0.0046 ± 3.3e-5	13478		0.0403 ± 4.8e-4	13500

## Sheet: Supp Fig 8
	distance to dendrite surface (nm)
	mean ± sem
Mouse p14	1107 ± 9.7
Mouse p105	1081 ± 7.5

## Sheet: Supp Fig 9
	mitochondria size (µm^3)
	mean ± sem	n
mouse p14	0.043 ± 0.0	398278
Mouse p105	0.069 ± 1.9e-4	533019

[truncated: 12 more sheets: Supp Fig 10, Supp Fig 13, mouse p6 axon replicates, Fig1b.V1 E spine syn, Fig1b.S1 E spine syn, Fig1c. V1 E shaft syn, Fig2b. V1  E axon syn per um, Fig 2c. V1 E axon branches per , Fig 3b. V1 syn per soma, Fig 3c. V1 axons per soma, Fig 3e. V1 soma syn bouton volu, Key]
